# Supplementary material
Source: PubMed Central journal article supplement (PMC4627250)
Supplement: i1552-5783-56-11-6823-s01.pdf [file i1552-5783-56-11-6823-s01.pdf]

**Supplementary Figure 1.** Slit lamp biomicroscope examination of additional *Col4a1*<sup>+/ $\Delta$ ex41</sup> mice on CASTB6F1 background. (**A, C, E**), front views and (**B, D, F**) side views of the same eye were shown. While most *Col4a1*<sup>+/ $\Delta$ ex41</sup> mutant eyes showed mild ASD phenotypes, eyes with relatively severe sub-phenotypes including severe cataract (**A-B**, arrowhead), severely enlarged anterior chamber, corneal neovascularization (**B, D**, asterisk) and iris coloboma (**E, F**, arrow) were also noted.
