# Supplementary material
Source: PubMed Central journal article supplement (PMC4627250)

**CASTB6F1**

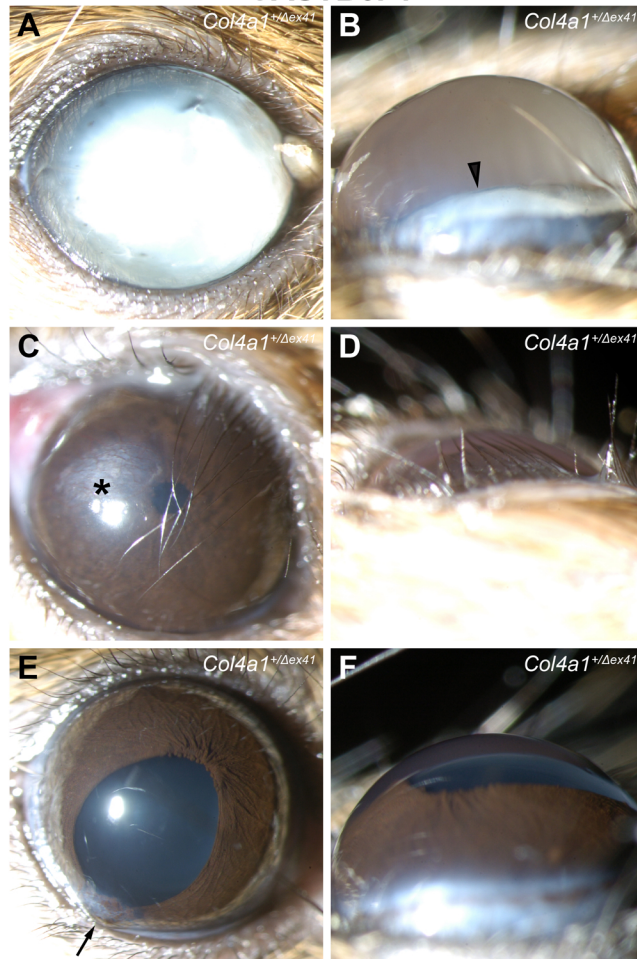

Supplement: i1552-5783-56-11-6823-s02.pdf [file i1552-5783-56-11-6823-s02.pdf]
